# Supplementary material
Source: MDPI journal article supplement (https://www.mdpi.com/2227-9717/10/11/2391)
Supplement: s1 [file s1]

# Electrochemical Oxidation of Anastrozole over a BDD Electrode: Role of Operating Parameters and Water Matrix

## Supplementary Material

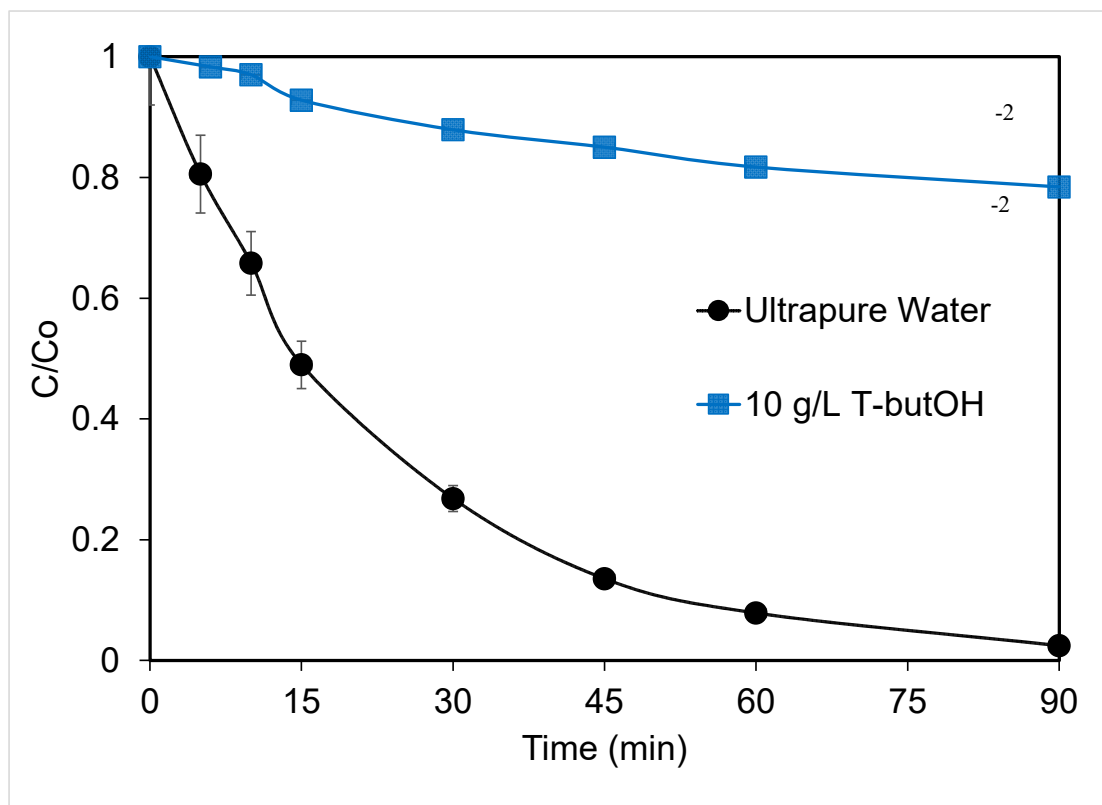

**Figure S1.** Influence of 10 g L<sup>-1</sup> tert-butanol addition on the removal of 1 mg L<sup>-1</sup> ANZ in UPW at 0.1 M Na<sub>2</sub>SO<sub>4</sub>, pH=6.2 and  $j=12.5 \text{ mA cm}^{-2}$  (galvanostatic conditions)
